# Supplementary material
Source: ML conference proceedings conference paper supplement (https://openaccess.thecvf.com/content/ICCV2021/html/Zhu_AdaFit_Rethinking_Learning-Based_ICCV_2021_paper.html)
Supplement: Supplementary file 1 [file Zhu_AdaFit_Rethinking_Learning-Based_ICCV_2021_supplemental.zip]

Archive with 3 entries (3 files):
- 06738-supp.pdf
- Column_surface.mov
- denoise.mov
